# Supplementary material for: Halogen regulation of multifunctional hybrid materials with photoluminescence and dielectric response
Source: Royal Society of Chemistry journal article supplement (doi:10.1039/d4qi01774a), 2024-01-01
Supplement: d4qi01774a1.pdf [file d4qi01774a1.pdf]

## Supplementary information

### Halogen regulation of multifunctional hybrid materials with photoluminescence and dielectric response

Jiu-Yang Liu,<sup>a</sup> Ming Zhu,<sup>b</sup> Feng-Wen Zhang,<sup>b</sup> Hao-Fei Ni,<sup>b</sup> Zhi-Long Li,<sup>a</sup> Bo Zhuang,<sup>a</sup> Kun Ding,<sup>a</sup> Da-Wei Fu,<sup>\*a</sup> Hai-Feng Lu,<sup>\*b</sup> and Meng-Meng Lun,<sup>\*c</sup>

<sup>a</sup> Ordered Matter Science Research Center, Jiangsu Key Laboratory for Science and Applications of Molecular Ferroelectrics, Southeast University, Nanjing 211189, People's Republic of China. E-mail: dawei@seu.edu.cn

<sup>b</sup> Institute for Science and Applications of Molecular Ferroelectrics, Key Laboratory of the Ministry of Education for Advanced Catalysis Materials, Zhejiang Normal University, Jinhua 321004, People's Republic of China. E-mail: luhaifeng@zjnu.edu.cn

<sup>c</sup> School of Electronics and Information, Zhengzhou University of Light Industry, Zhengzhou, 450000, People's Republic of China. E-mail: 230208797@seu.edu.cn

## **Experimental Section**

### **Synthesis and Growth of Crystals**

All chemical reagents used in this work were obtained from commercial sources without further purification. The synthesis of the ligands 2,5-FBTA can refer to previous reports. Weigh 2 mmol 2,5-FBTA in a beaker, dissolve it with 15 mL methanol solution, then add hydrobromic acid, and then add 2 mmol MnBr<sub>2</sub>. After complete dissolution, it slowly evaporates at room temperature, and after a few weeks, a green FBTAM-Br massive crystal is obtained. The crystals of FBTAM-Cl and FBTAM-I were obtained by the same method.

### **Detailed methods of measurements**

#### **Variable-Temperature Single-crystal XRD**

The Rigaku Saturn 724 diffractometer with Mo K $\alpha$  radiation ( $\lambda = 0.71073 \text{ \AA}$ ) was used to obtain single crystal X-ray diffraction data. The direct method was used to solve the variable temperature crystal structure data, and the SHELXL software was used to analyze and refine the crystal structure. Import the generated CIF file into DIAMOND to draw the corresponding asymmetric cell diagram and stack diagram, and calculate the selected bond distances and angles through Mercury. Table S1-S8 summarize the data collection of these crystals. These X-ray crystal structures have been stored at the Cambridge Crystallography Data Center (storage number CCDC 2368921-2368925) and are available free of charge from CCDC at [www.ccdc.cam.ac.uk/getstructures](http://www.ccdc.cam.ac.uk/getstructures).

#### **DSC Measurement**

Grind crystal into powder, weigh about 10 mg of powder, and place it in an aluminum crucible. Under nitrogen protection of the environment, the NETZSCH DSC 214 Polymer instrument is used to uniformly heat and cool at a rate of 20 K/min.

#### **Dielectric Measurement**

Press the powder sample into sheets, use conductive silver glue and copper wire as the medium, and connect the sheet sample to both ends of the electrode to make a capacitor. The complex dielectric constant at different frequencies was measured using Tonghui TH2828A instrument at 1V AC voltage.

#### **Powder X-ray diffraction**

Powder X-ray diffraction (PXRD) measurements were performed at room temperature on a Rigaku SmartLab SE X-ray diffractometer. The diffraction pattern is recorded at  $2\theta$  between 0-50° within the range, the step size is 0.01°. Variable temperature powder X-ray diffraction pattern tested in the temperature range of 298-433 K through programmed heating and cooling.

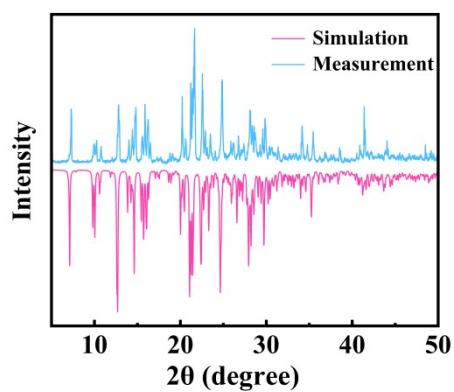

Fig. S1 PXRd spectra of FBTAM-Br at LTP.

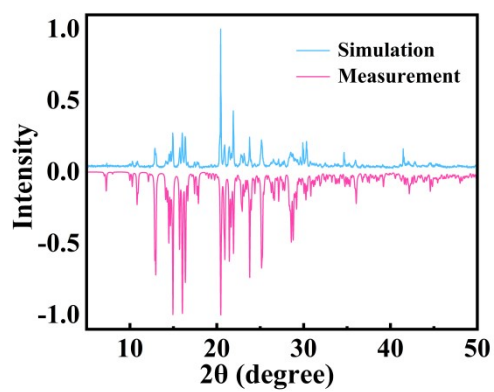

Fig. S2 PXRd spectra of FBTAM-Cl at LTP.

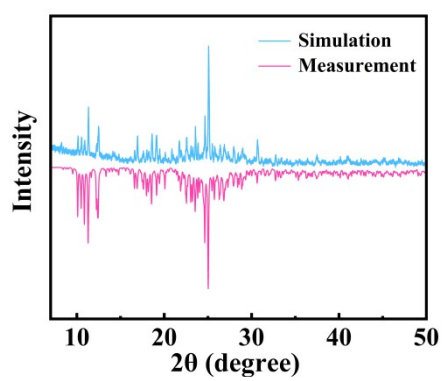

Fig. S3 PXRd spectra of FBTAM-I at LTP.

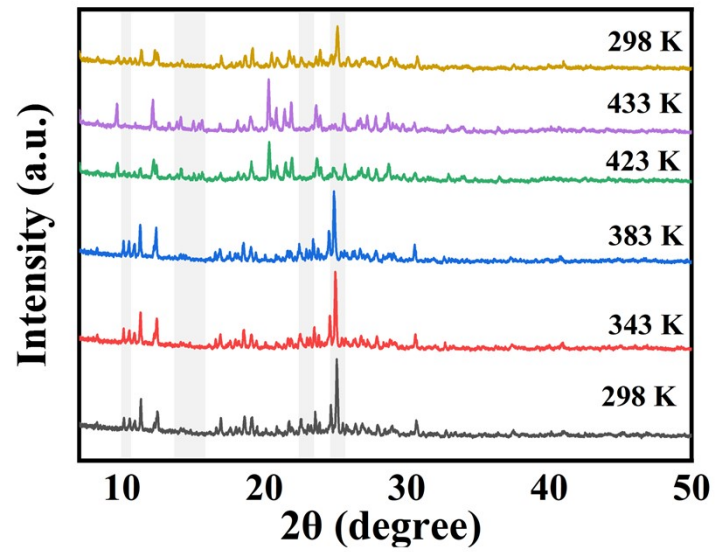

Fig. S4 Variable-temperature PXRD spectra of FBTAM-I.

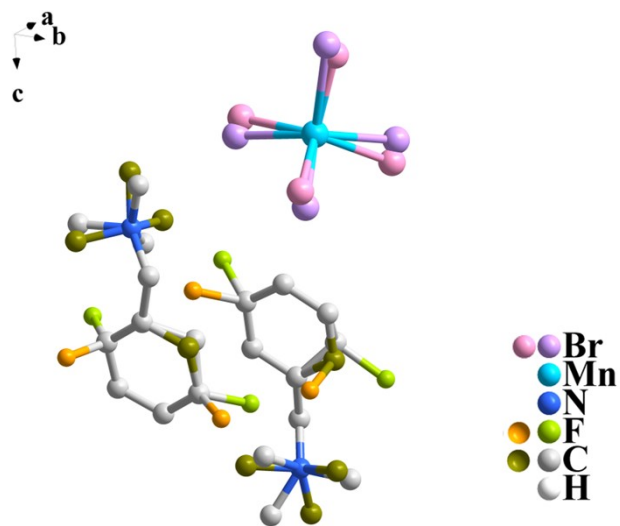

Fig. S5 The crystal structure of FBTAM-Br in the HTP.

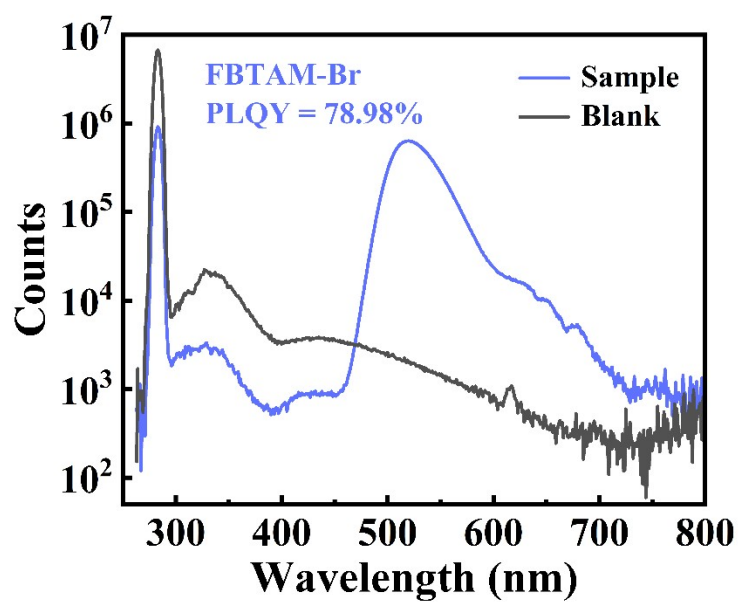

Fig. S6 Quantum yield of FBTAM-Br.

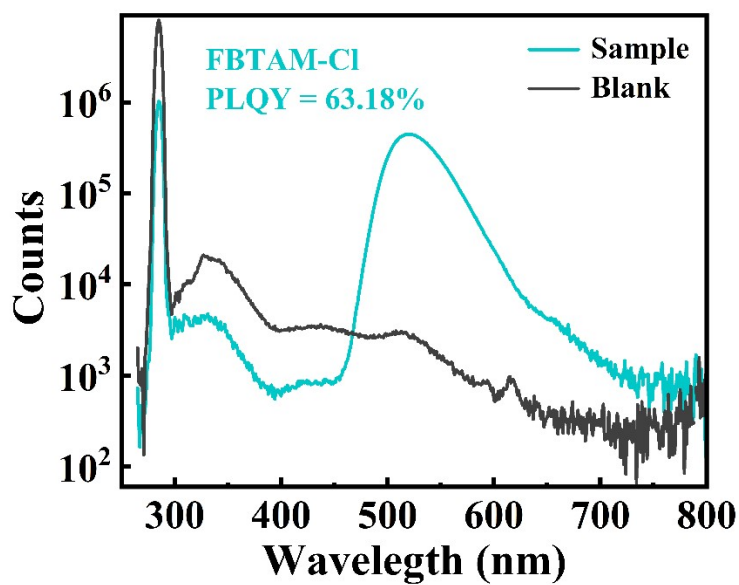

Fig. S7 Quantum yield of FBTAM-Cl.

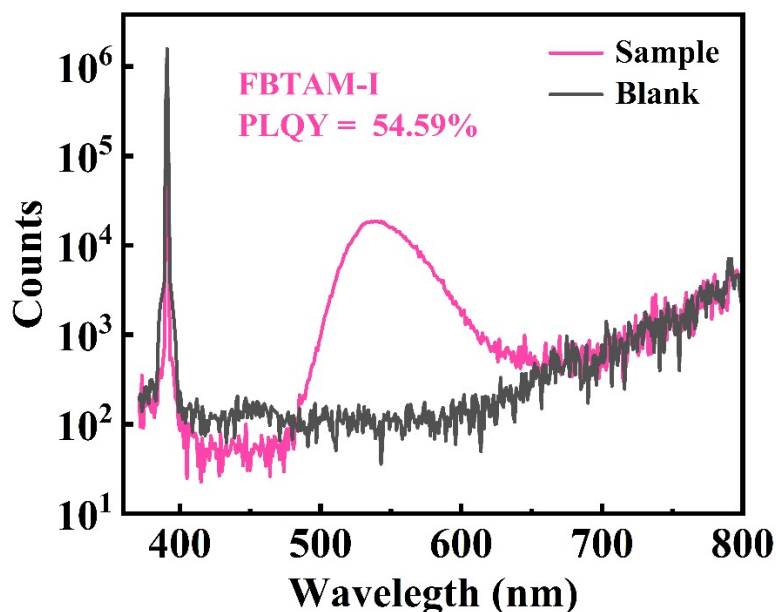

Fig. S8 Quantum yield of FBTAM-I.

Table S1 Crystal data and structure refinements for FBTAM-Br in the LTP and HTP.

|                              | FBTAM-Br (300K)                                                                 | FBTAM-Br (443K)                                                                 |
|------------------------------|---------------------------------------------------------------------------------|---------------------------------------------------------------------------------|
| <b>Empirical formula</b>     | C <sub>20</sub> H <sub>28</sub> Br <sub>4</sub> F <sub>4</sub> MnN <sub>2</sub> | C <sub>20</sub> H <sub>28</sub> Br <sub>4</sub> F <sub>4</sub> MnN <sub>2</sub> |
| <b>Formula weight</b>        | 747.02                                                                          | 747.02                                                                          |
| <b>Space group</b>           | <i>P</i> 2 <sub>1</sub> / <i>c</i> (14)                                         | <i>P</i> 2 <sub>1</sub> / <i>n</i> (14)                                         |
| <b>Crystal system</b>        | monoclinic                                                                      | monoclinic                                                                      |
| <b>a/ Å</b>                  | 27.665(9)                                                                       | 9.0041(19)                                                                      |
| <b>b/ Å</b>                  | 8.864(3)                                                                        | 13.0052(15)                                                                     |
| <b>c/ Å</b>                  | 25.542(4)                                                                       | 24.957(4)                                                                       |
| <b>α/°</b>                   | 90                                                                              | 90                                                                              |
| <b>β/°</b>                   | 116.083(13)                                                                     | 90.039(11)                                                                      |
| <b>γ/°</b>                   | 90                                                                              | 90                                                                              |
| <b>Volume/ Å<sup>3</sup></b> | 5626(3)                                                                         | 2922.4(8)                                                                       |
| <b>Z</b>                     | 8                                                                               | 4                                                                               |
| <b>F(000)</b>                | 2904                                                                            | 1452                                                                            |
| <b>GOF</b>                   | 1.137                                                                           | 1.094                                                                           |
| <b>R<sub>int</sub></b>       | 0.1243                                                                          | 0.1328                                                                          |
| <b>R<sub>1</sub></b>         | 0.1093                                                                          | 0.1137                                                                          |
| <b>wR<sub>2</sub></b>        | 0.3092                                                                          | 0.2658                                                                          |

Table S2 The bond lengths (Å) and angles (°) of FBTAM-Br in the LTP.

| Atom–Atom | Length [Å] | Atom–Atom–Atom | Angle [°] |
|-----------|------------|----------------|-----------|
| Br1–Mn1   | 2.4868(15) | Br1–Mn1–Br2    | 111.09(5) |
| Br4–Mn2   | 2.5024(16) | Br1–Mn1–Br3    | 112.52(6) |
| Br6–Mn2   | 2.5011(17) | Br1–Mn1–Br7    | 108.43(5) |
| Br8–Mn2   | 2.5117(16) | Br3–Mn1–Br2    | 108.48(6) |
| Br2–Mn1   | 2.5107(17) | Br7–Mn1–Br2    | 110.45(6) |
| Br5–Mn2   | 2.4879(16) | Br7–Mn1–Br3    | 105.74(5) |
| Br3–Mn1   | 2.5041(15) | Br4–Mn2–Br8    | 107.52(5) |
| Br7–Mn1   | 2.5015(17) | Br6–Mn2–Br4    | 106.86(6) |
| N1–C4     | 1.499(10)  | Br6–Mn2–Br8    | 107.59(6) |

|          |           |               |           |
|----------|-----------|---------------|-----------|
| N1-C12   | 1.503(13) | Br5-Mn2-Br4   | 109.29(6) |
| N1-C40   | 1.463(14) | Br5-Mn2-Br6   | 113.51(5) |
| N1-C2    | 1.486(13) | Br5-Mn2-Br8   | 111.78(6) |
| F1-C20   | 1.294(14) | C4-N1-C12     | 107.4(7)  |
| N4-C16   | 1.554(11) | C40-N1-C4     | 111.2(8)  |
| N4-C34   | 1.472(12) | C40-N1-C12    | 110.1(8)  |
| N4-C36   | 1.486(12) | C40-N1-C2     | 109.1(9)  |
| N4-C44   | 1.498(11) | C2-N1-C4      | 110.6(6)  |
| F4-C23   | 1.363(10) | C2-N1-C12     | 108.4(9)  |
| N2-C8    | 1.534(11) | C34-N4-C16    | 109.7(6)  |
| N2-C22   | 1.494(12) | C34-N4-C36    | 111.2(8)  |
| N2-C15   | 1.475(12) | C34-N4-C44    | 110.6(8)  |
| N2-C37   | 1.466(10) | C36-N4-C16    | 111.3(7)  |
| F6-C19   | 1.305(13) | C36-N4-C44    | 106.8(7)  |
| N3-C28   | 1.489(12) | C44-N4-C16    | 107.1(7)  |
| N3-C38   | 1.473(15) | C22-N2-C8     | 111.0(7)  |
| N3-C42   | 1.480(13) | C15-N2-C8     | 111.3(7)  |
| N3-C7    | 1.522(11) | C15-N2-C22    | 109.5(7)  |
| C1-C6    | 1.397(13) | C37-N2-C8     | 107.7(7)  |
| C1-C16   | 1.502(10) | C37-N2-C22    | 110.7(7)  |
| C1-C20   | 1.353(11) | C37-N2-C15    | 106.5(8)  |
| C4-H4A   | 0.9700    | C28-N3-C7     | 105.5(8)  |
| C4-H4B   | 0.9700    | C38-N3-C28    | 109.9(9)  |
| C4-C14   | 1.500(12) | C38-N3-C42    | 110.6(8)  |
| F8-C31   | 1.363(8)  | C38-N3-C7     | 111.1(7)  |
| C6-H6    | 0.9300    | C42-N3-C28    | 108.6(7)  |
| C6-C23   | 1.385(9)  | C42-N3-C7     | 110.9(8)  |
| C8-H8A   | 0.9700    | C6-C1-C16     | 119.9(7)  |
| C8-H8B   | 0.9700    | C20-C1-C6     | 119.0(8)  |
| C8-C26   | 1.499(8)  | C20-C1-C16    | 120.9(9)  |
| C10-F12  | 1.364(10) | N1-C4-H4A     | 108.1     |
| C10-C24  | 1.399(13) | N1-C4-H4B     | 108.1     |
| C10-C9   | 1.397(10) | N1-C4-C14     | 116.8(8)  |
| C10-F9   | 1.376(8)  | H4A-C4-H4B    | 107.3     |
| C10-C21  | 1.400(9)  | C14-C4-H4A    | 108.1     |
| F10-C35  | 1.360(11) | C14-C4-H4B    | 108.1     |
| C12-H12A | 0.9600    | C1-C6-H6      | 120.1     |
| C12-H12B | 0.9600    | C23-C6-C1     | 119.8(7)  |
| C12-H12C | 0.9600    | C23-C6-H6     | 120.1     |
| C14-C24  | 1.345(14) | N2-C8-H8A     | 108.7     |
| C14-C31  | 1.377(12) | N2-C8-H8B     | 108.7     |
| C16-H16A | 0.9700    | H8A-C8-H8B    | 107.6     |
| C16-H16B | 0.9700    | C26-C8-N2     | 114.2(6)  |
| C18-H18  | 0.9300    | C26-C8-H8A    | 108.7     |
| C18-C3   | 1.32(2)   | C26-C8-H8B    | 108.7     |
| C18-C19  | 1.438(13) | F12-C10-C24   | 120.5(10) |
| C20-C39  | 1.388(16) | F12-C10-C9    | 115.6(10) |
| C22-H22A | 0.9600    | C24-C10-C21   | 116.2(7)  |
| C22-H22B | 0.9600    | C9-C10-C24    | 123.7(8)  |
| C22-H22C | 0.9600    | F9-C10-C24    | 113.0(9)  |
| C24-H24  | 0.9300    | F9-C10-C21    | 130.7(9)  |
| C26-C13  | 1.406(10) | N1-C12-H12A   | 109.5     |
| C26-C35  | 1.335(9)  | N1-C12-H12B   | 109.5     |
| C26-C11  | 1.404(10) | N1-C12-H12C   | 109.5     |
| C28-H28A | 0.9600    | H12A-C12-H12B | 109.5     |
| C28-H28B | 0.9600    | H12A-C12-H12C | 109.5     |
| C28-H28C | 0.9600    | H12B-C12-H12C | 109.5     |

|          |           |               |           |
|----------|-----------|---------------|-----------|
| C30-H30  | 0.9300    | C24-C14-C4    | 121.9(10) |
| C30-C23  | 1.302(14) | C24-C14-C31   | 117.6(9)  |
| C30-C39  | 1.46(2)   | C31-C14-C4    | 120.2(7)  |
| C32-H32  | 0.9300    | N4-C16-H16A   | 108.3     |
| C32-C45  | 1.308(14) | N4-C16-H16B   | 108.3     |
| C32-C17  | 1.425(15) | C1-C16-N4     | 115.9(7)  |
| F14-C27  | 1.371(10) | C1-C16-H16A   | 108.3     |
| C34-H34A | 0.9600    | C1-C16-H16B   | 108.3     |
| C34-H34B | 0.9600    | H16A-C16-H16B | 107.4     |
| C34-H34C | 0.9600    | C3-C18-H18    | 120.5     |
| C36-H36A | 0.9600    | C3-C18-C19    | 118.9(13) |
| C36-H36B | 0.9600    | C19-C18-H18   | 120.5     |
| C36-H36C | 0.9600    | F1-C20-C1     | 121.0(9)  |
| C38-H38A | 0.9600    | F1-C20-C39    | 117.9(9)  |
| C38-H38B | 0.9600    | C1-C20-C39    | 121.1(11) |
| C38-H38C | 0.9600    | N2-C22-H22A   | 109.5     |
| C40-H40A | 0.9600    | N2-C22-H22B   | 109.5     |
| C40-H40B | 0.9600    | N2-C22-H22C   | 109.5     |
| C40-H40C | 0.9600    | H22A-C22-H22B | 109.5     |
| C42-H42A | 0.9600    | H22A-C22-H22C | 109.5     |
| C42-H42B | 0.9600    | H22B-C22-H22C | 109.5     |
| C42-H42C | 0.9600    | C10-C24-H24   | 119.4     |
| C44-H44A | 0.9600    | C14-C24-C10   | 121.2(11) |
| C44-H44B | 0.9600    | C14-C24-H24   | 119.4     |
| C44-H44C | 0.9600    | C13-C26-C8    | 114.3(6)  |
| C45-C7   | 1.517(11) | C35-C26-C8    | 125.2(7)  |
| C45-C19  | 1.346(15) | C35-C26-C13   | 120.2(6)  |
| C23-F11  | 1.362(10) | C35-C26-C11   | 116.4(6)  |
| C3-H3    | 0.9300    | C11-C26-C8    | 118.1(6)  |
| C3-C17   | 1.34(2)   | N3-C28-H28A   | 109.5     |
| F7-C17   | 1.367(9)  | N3-C28-H28B   | 109.5     |
| C25-H25  | 0.9300    | N3-C28-H28C   | 109.5     |
| C25-C27  | 1.408(9)  | H28A-C28-H28B | 109.5     |
| C25-C33  | 1.407(10) | H28A-C28-H28C | 109.5     |
| C13-H13  | 0.9300    | H28B-C28-H28C | 109.5     |
| C13-C27  | 1.403(8)  | C23-C30-H30   | 120.8     |
| C7-H7A   | 0.9700    | C23-C30-C39   | 118.5(10) |
| C7-H7B   | 0.9700    | C39-C30-H30   | 120.8     |
| C29-H29  | 0.9300    | C45-C32-H32   | 120.1     |
| C29-C31  | 1.404(8)  | C45-C32-C17   | 119.7(12) |
| C29-C9   | 1.399(10) | C17-C32-H32   | 120.1     |
| C15-H15A | 0.9600    | N4-C34-H34A   | 109.5     |
| C15-H15B | 0.9600    | N4-C34-H34B   | 109.5     |
| C15-H15C | 0.9600    | N4-C34-H34C   | 109.5     |
| C31-F2   | 1.365(9)  | H34A-C34-H34B | 109.5     |
| C31-C43  | 1.400(9)  | H34A-C34-H34C | 109.5     |
| C2-H2A   | 0.9600    | H34B-C34-H34C | 109.5     |
| C2-H2B   | 0.9600    | N4-C36-H36A   | 109.5     |
| C2-H2C   | 0.9600    | N4-C36-H36B   | 109.5     |
| C33-H33A | 0.9300    | N4-C36-H36C   | 109.5     |
| C33-H33  | 0.9300    | H36A-C36-H36B | 109.5     |
| C33-C35  | 1.401(9)  | H36A-C36-H36C | 109.5     |
| C33-C5   | 1.394(10) | H36B-C36-H36C | 109.5     |
| C17-F5   | 1.365(10) | N3-C38-H38A   | 109.5     |
| C35-F3   | 1.367(10) | N3-C38-H38B   | 109.5     |
| C9-H9    | 0.9300    | N3-C38-H38C   | 109.5     |
| C37-H37A | 0.9600    | H38A-C38-H38B | 109.5     |



|          |           |               |           |
|----------|-----------|---------------|-----------|
| C37-H37B | 0.9600    | H38A-C38-H38C | 109.5     |
| C37-H37C | 0.9600    | H38B-C38-H38C | 109.5     |
| C39-H39  | 0.9300    | N1-C40-H40A   | 109.5     |
| F13-C41  | 1.364(11) | N1-C40-H40B   | 109.5     |
| C5-H5    | 0.9300    | N1-C40-H40C   | 109.5     |
| C5-C41   | 1.396(9)  | H40A-C40-H40B | 109.5     |
| C41-C11  | 1.402(8)  | H40A-C40-H40C | 109.5     |
| C21-H21  | 0.9300    | H40B-C40-H40C | 109.5     |
| C21-C43  | 1.399(10) | N3-C42-H42A   | 109.5     |
| C43-H43  | 0.9300    | N3-C42-H42B   | 109.5     |
| C11-H11  | 0.9300    | N3-C42-H42C   | 109.5     |
|          |           | H42A-C42-H42B | 109.5     |
|          |           | H42A-C42-H42C | 109.5     |
|          |           | H42B-C42-H42C | 109.5     |
|          |           | N4-C44-H44A   | 109.5     |
|          |           | N4-C44-H44B   | 109.5     |
|          |           | N4-C44-H44C   | 109.5     |
|          |           | H44A-C44-H44B | 109.5     |
|          |           | H44A-C44-H44C | 109.5     |
|          |           | H44B-C44-H44C | 109.5     |
|          |           | C32-C45-C7    | 120.6(10) |
|          |           | C32-C45-C19   | 121.2(9)  |
|          |           | C19-C45-C7    | 118.1(8)  |
|          |           | F4-C23-C6     | 108.8(6)  |
|          |           | C30-C23-F4    | 128.3(8)  |
|          |           | C30-C23-C6    | 122.8(9)  |
|          |           | C30-C23-F11   | 111.3(8)  |
|          |           | F11-C23-C6    | 124.8(7)  |
|          |           | C18-C3-H3     | 119.5     |
|          |           | C18-C3-C17    | 121.0(11) |
|          |           | C17-C3-H3     | 119.5     |
|          |           | C27-C25-H25   | 114.4     |
|          |           | C33-C25-H25   | 114.4     |
|          |           | C33-C25-C27   | 131.3(8)  |
|          |           | C26-C13-H13   | 118.3     |
|          |           | C27-C13-C26   | 123.4(8)  |
|          |           | C27-C13-H13   | 118.3     |
|          |           | F14-C27-C25   | 130.2(7)  |
|          |           | F14-C27-C13   | 120.0(7)  |
|          |           | C13-C27-C25   | 109.5(8)  |
|          |           | N3-C7-H7A     | 108.4     |
|          |           | N3-C7-H7B     | 108.4     |
|          |           | C45-C7-N3     | 115.4(8)  |
|          |           | C45-C7-H7A    | 108.4     |
|          |           | C45-C7-H7B    | 108.4     |
|          |           | H7A-C7-H7B    | 107.5     |
|          |           | C31-C29-H29   | 118.0     |
|          |           | C9-C29-H29    | 118.0     |
|          |           | C9-C29-C31    | 124.0(9)  |
|          |           | N2-C15-H15A   | 109.5     |
|          |           | N2-C15-H15B   | 109.5     |
|          |           | N2-C15-H15C   | 109.5     |
|          |           | H15A-C15-H15B | 109.5     |
|          |           | H15A-C15-H15C | 109.5     |
|          |           | H15B-C15-H15C | 109.5     |
|          |           | F8-C31-C14    | 120.6(7)  |
|          |           | F8-C31-C29    | 118.3(9)  |

|               |           |
|---------------|-----------|
| C14-C31-C29   | 120.1(7)  |
| C14-C31-C43   | 124.0(7)  |
| F2-C31-C14    | 115.9(8)  |
| F2-C31-C43    | 120.0(9)  |
| N1-C2-H2A     | 109.5     |
| N1-C2-H2B     | 109.5     |
| N1-C2-H2C     | 109.5     |
| H2A-C2-H2B    | 109.5     |
| H2A-C2-H2C    | 109.5     |
| H2B-C2-H2C    | 109.5     |
| C25-C33-H33A  | 124.8     |
| C35-C33-C25   | 110.4(7)  |
| C35-C33-H33A  | 124.8     |
| C35-C33-H33   | 116.9     |
| C5-C33-H33    | 116.9     |
| C5-C33-C35    | 126.2(7)  |
| C3-C17-C32    | 119.6(9)  |
| C3-C17-F7     | 124.8(11) |
| C3-C17-F5     | 117.6(12) |
| F7-C17-C32    | 112.4(12) |
| F5-C17-C32    | 120.8(13) |
| F10-C35-C33   | 111.1(7)  |
| C26-C35-F10   | 124.0(7)  |
| C26-C35-C33   | 124.0(7)  |
| C26-C35-F3    | 113.9(6)  |
| F3-C35-C33    | 121.6(7)  |
| C10-C9-C29    | 111.9(7)  |
| C10-C9-H9     | 124.1     |
| C29-C9-H9     | 124.1     |
| N2-C37-H37A   | 109.5     |
| N2-C37-H37B   | 109.5     |
| N2-C37-H37C   | 109.5     |
| H37A-C37-H37B | 109.5     |
| H37A-C37-H37C | 109.5     |
| H37B-C37-H37C | 109.5     |
| F6-C19-C18    | 116.6(11) |
| F6-C19-C45    | 123.9(8)  |
| C45-C19-C18   | 119.4(10) |
| C20-C39-C30   | 118.6(10) |
| C20-C39-H39   | 120.7     |
| C30-C39-H39   | 120.7     |
| C33-C5-H5     | 128.6     |
| C33-C5-C41    | 102.9(7)  |
| C41-C5-H5     | 128.6     |
| F13-C41-C5    | 105.1(7)  |
| F13-C41-C11   | 119.2(8)  |
| C5-C41-C11    | 135.1(9)  |
| C10-C21-H21   | 118.6     |
| C43-C21-C10   | 122.7(9)  |
| C43-C21-H21   | 118.6     |
| C31-C43-H43   | 123.5     |
| C21-C43-C31   | 113.0(9)  |
| C21-C43-H43   | 123.5     |
| C26-C11-H11   | 123.2     |
| C41-C11-C26   | 113.6(8)  |
| C41-C11-H11   | 123.2     |

---

**Table S3** The bond lengths (Å) and angles (°) of FBTAM-Br in the HTP.

| Atom-Atom | Length [Å] | Atom-Atom-Atom | Angle [°] |
|-----------|------------|----------------|-----------|
| Br1B-Mn1  | 2.48(2)    | Br1B-Mn1-Br4B  | 105.1(9)  |
| Br4B-Mn1  | 2.74(2)    | Br1B-Mn1-Br2B  | 118.4(12) |
| Br2B-Mn1  | 2.56(3)    | Br1B-Mn1-Br3B  | 110.1(10) |
| Br3B-Mn1  | 2.49(3)    | Br2B-Mn1-Br4B  | 95.1(13)  |
| Mn1-Br2A  | 2.466(16)  | Br3B-Mn1-Br4B  | 103.5(10) |
| Mn1-Br1A  | 2.513(10)  | Br3B-Mn1-Br2B  | 120.6(11) |
| Mn1-Br4A  | 2.357(18)  | Br2A-Mn1-Br1A  | 105.8(6)  |
| Mn1-Br3A  | 2.512(16)  | Br2A-Mn1-Br3A  | 101.0(9)  |
| N1-C1     | 1.56(7)    | Br4A-Mn1-Br2A  | 114.7(9)  |
| N1-C4     | 1.40(3)    | Br4A-Mn1-Br1A  | 116.4(6)  |
| N1-C6     | 1.497(10)  | Br4A-Mn1-Br3A  | 107.9(4)  |
| N1-C8     | 1.495(10)  | Br3A-Mn1-Br1A  | 110.0(5)  |
| N1-C24    | 1.42(5)    | C4-N1-C1       | 112(3)    |
| N1-C26    | 1.480(18)  | C4-N1-C6       | 119(2)    |
| N1-C28    | 1.63(5)    | C4-N1-C8       | 94(2)     |
| C1-H1A    | 0.9604     | C4-N1-C24      | 110(3)    |
| C1-H1B    | 0.9598     | C4-N1-C26      | 132(2)    |
| C1-H1C    | 0.9594     | C4-N1-C28      | 97.7(19)  |
| C4-H4A    | 0.9700     | C6-N1-C1       | 109(3)    |
| C4-H4B    | 0.9700     | C8-N1-C1       | 109(4)    |
| C4-C18    | 1.521(10)  | C8-N1-C6       | 114(2)    |
| C6-H6A    | 0.9600     | C24-N1-C26     | 112(3)    |
| C6-H6B    | 0.9602     | C24-N1-C28     | 106(3)    |
| C6-H6C    | 0.9599     | C26-N1-C28     | 91(2)     |
| C8-H8A    | 0.9600     | N1-C1-H1A      | 115.8     |
| C8-H8B    | 0.9598     | N1-C1-H1B      | 106.8     |
| C8-H8C    | 0.9599     | N1-C1-H1C      | 105.6     |
| F1-C10    | 1.59(2)    | H1A-C1-H1B     | 109.5     |
| C10-C12   | 1.3900     | H1A-C1-H1C     | 109.5     |
| C10-C20   | 1.3900     | H1B-C1-H1C     | 109.5     |
| C10-F6    | 1.59(2)    | N1-C4-H4A      | 109.2     |
| C12-H12   | 0.9300     | N1-C4-H4B      | 109.2     |
| C12-C14   | 1.3900     | N1-C4-C18      | 112(2)    |
| C14-H14A  | 0.9300     | H4A-C4-H4B     | 107.9     |
| C14-H14   | 0.9300     | C18-C4-H4A     | 109.2     |
| C14-C16   | 1.3900     | C18-C4-H4B     | 109.2     |
| C14-C22   | 1.410(17)  | N1-C6-H6A      | 107.0     |
| C16-C18   | 1.3900     | N1-C6-H6B      | 107.3     |
| C16-F8    | 1.62(2)    | N1-C6-H6C      | 114.0     |
| C18-C20   | 1.3900     | H6A-C6-H6B     | 109.5     |
| C18-C22   | 1.411(17)  | H6A-C6-H6C     | 109.5     |
| C20-H20   | 0.9300     | H6B-C6-H6C     | 109.4     |
| F4-C22    | 1.61(2)    | N1-C8-H8A      | 108.4     |
| C24-H24A  | 0.9600     | N1-C8-H8B      | 108.7     |
| C24-H24B  | 0.9600     | N1-C8-H8C      | 111.2     |
| C24-H24C  | 0.9600     | H8A-C8-H8B     | 109.5     |
| C26-H26A  | 0.9600     | H8A-C8-H8C     | 109.5     |
| C26-H26B  | 0.9601     | H8B-C8-H8C     | 109.5     |
| C26-H26C  | 0.9598     | C12-C10-F1     | 104(2)    |
| C28-H28A  | 0.9598     | C12-C10-C20    | 120.0     |
| C28-H28B  | 0.9597     | C12-C10-F6     | 116.4(18) |
| C28-H28C  | 0.9599     | C20-C10-F1     | 119(2)    |
| C7-H7     | 0.9300     | C20-C10-F6     | 109.7(18) |
| C7-C15    | 1.3900     | C10-C12-H12    | 120.0     |
| C7-C19    | 1.3900     | C10-C12-C14    | 120.0     |

|          |           |               |           |
|----------|-----------|---------------|-----------|
| C15-H15  | 0.9300    | C14-C12-H12   | 120.0     |
| C15-C2   | 1.3900    | C12-C14-H14A  | 120.0     |
| C2-C17   | 1.3900    | C12-C14-H14   | 126.5     |
| C2-F3    | 1.58(2)   | C12-C14-C16   | 120.0     |
| C2-F7    | 1.55(2)   | C12-C14-C22   | 107.0(17) |
| C17-C9   | 1.3900    | C16-C14-H14A  | 120.0     |
| C17-C11  | 1.611(18) | C22-C14-H14   | 126.5     |
| C17-C3   | 1.45(9)   | C14-C16-C18   | 120.0     |
| C9-H9    | 0.9300    | C14-C16-F8    | 89.9(18)  |
| C9-C19   | 1.3900    | C18-C16-F8    | 93.6(19)  |
| C19-F2   | 1.474(15) | C16-C18-C4    | 129.5(17) |
| C19-C3   | 1.410(15) | C20-C18-C4    | 109.0(17) |
| C19-F5   | 1.546(19) | C20-C18-C16   | 120.0     |
| C5-H5A   | 0.9603    | C20-C18-C22   | 107.0(17) |
| C5-H5B   | 0.9600    | C22-C18-C4    | 127(2)    |
| C5-H5C   | 0.9599    | C10-C20-H20   | 120.0     |
| C5-N2    | 1.482(13) | C18-C20-C10   | 120.0     |
| N2-C21   | 1.481(13) | C18-C20-H20   | 120.0     |
| N2-C11   | 1.535(17) | C14-C22-C18   | 117.2(18) |
| N2-C23   | 1.479(13) | C14-C22-F4    | 115(3)    |
| N2-C25   | 1.453(16) | C18-C22-F4    | 102(2)    |
| N2-C13   | 1.455(16) | N1-C24-H24A   | 109.5     |
| N2-C27   | 1.453(16) | N1-C24-H24B   | 109.5     |
| C21-H21A | 0.9600    | N1-C24-H24C   | 109.5     |
| C21-H21B | 0.9597    | H24A-C24-H24B | 109.5     |
| C21-H21C | 0.9597    | H24A-C24-H24C | 109.5     |
| C11-H11A | 0.9700    | H24B-C24-H24C | 109.5     |
| C11-H11B | 0.9700    | N1-C26-H26A   | 137.3     |
| C23-H23A | 0.9600    | N1-C26-H26B   | 81.9      |
| C23-H23B | 0.9600    | N1-C26-H26C   | 104.4     |
| C23-H23C | 0.9599    | H26A-C26-H26B | 109.5     |
| C3-H3    | 0.9300    | H26A-C26-H26C | 109.5     |
| C25-H25A | 0.9602    | H26B-C26-H26C | 109.5     |
| C25-H25B | 0.9602    | N1-C28-H28A   | 111.8     |
| C25-H25C | 0.9596    | N1-C28-H28B   | 92.1      |
| C13-H13A | 0.9598    | N1-C28-H28C   | 122.8     |
| C13-H13B | 0.9597    | H28A-C28-H28B | 109.5     |
| C13-H13C | 0.9601    | H28A-C28-H28C | 109.5     |
| C27-H27A | 0.9603    | H28B-C28-H28C | 109.4     |
| C27-H27B | 0.9597    | C15-C7-H7     | 120.0     |
| C27-H27C | 0.9602    | C15-C7-C19    | 120.0     |
|          |           | C19-C7-H7     | 120.0     |
|          |           | C7-C15-H15    | 120.0     |
|          |           | C2-C15-C7     | 120.0     |
|          |           | C2-C15-H15    | 120.0     |
|          |           | C15-C2-F3     | 90(2)     |
|          |           | C15-C2-F7     | 104(2)    |
|          |           | C17-C2-C15    | 120.0     |
|          |           | C17-C2-F3     | 124(3)    |
|          |           | C17-C2-F7     | 95.6(19)  |
|          |           | C2-C17-C9     | 120.0     |
|          |           | C2-C17-C11    | 142(2)    |
|          |           | C2-C17-C3     | 114.9(18) |
|          |           | C9-C17-C11    | 98(2)     |
|          |           | C3-C17-C11    | 102(3)    |
|          |           | C17-C9-H9     | 120.0     |
|          |           | C17-C9-C19    | 120.0     |

|               |           |
|---------------|-----------|
| C19-C9-H9     | 120.0     |
| C7-C19-F2     | 128(2)    |
| C7-C19-C3     | 116(2)    |
| C7-C19-F5     | 101.3(18) |
| C9-C19-C7     | 120.0     |
| C9-C19-F5     | 123(2)    |
| C3-C19-F2     | 109(2)    |
| H5A-C5-H5B    | 109.5     |
| H5A-C5-H5C    | 109.5     |
| H5B-C5-H5C    | 109.5     |
| N2-C5-H5A     | 119.7     |
| N2-C5-H5B     | 107.6     |
| N2-C5-H5C     | 100.6     |
| C5-N2-C11     | 94.6(19)  |
| C21-N2-C5     | 101(5)    |
| C21-N2-C11    | 100(2)    |
| C23-N2-C5     | 102(2)    |
| C23-N2-C21    | 95(4)     |
| C23-N2-C11    | 155(4)    |
| C25-N2-C11    | 120(3)    |
| C25-N2-C13    | 106(2)    |
| C25-N2-C27    | 105(2)    |
| C13-N2-C11    | 106(3)    |
| C27-N2-C11    | 110(2)    |
| C27-N2-C13    | 110(3)    |
| N2-C21-H21A   | 108.9     |
| N2-C21-H21B   | 117.8     |
| N2-C21-H21C   | 101.3     |
| H21A-C21-H21B | 109.5     |
| H21A-C21-H21C | 109.5     |
| H21B-C21-H21C | 109.5     |
| C17-C11-H11A  | 110.9     |
| C17-C11-H11B  | 110.9     |
| N2-C11-C17    | 104.3(17) |
| N2-C11-H11A   | 110.9     |
| N2-C11-H11B   | 110.9     |
| H11A-C11-H11B | 108.9     |
| N2-C23-H23A   | 107.2     |
| N2-C23-H23B   | 108.7     |
| N2-C23-H23C   | 112.5     |
| H23A-C23-H23B | 109.5     |
| H23A-C23-H23C | 109.5     |
| H23B-C23-H23C | 109.5     |
| C17-C3-H3     | 122.7     |
| C19-C3-C17    | 115(5)    |
| C19-C3-H3     | 122.7     |
| N2-C25-H25A   | 111.5     |
| N2-C25-H25B   | 125.9     |
| N2-C25-H25C   | 88.4      |
| H25A-C25-H25B | 109.5     |
| H25A-C25-H25C | 109.4     |
| H25B-C25-H25C | 109.5     |
| N2-C13-H13A   | 91.5      |
| N2-C13-H13B   | 119.2     |
| N2-C13-H13C   | 115.9     |
| H13A-C13-H13B | 109.5     |
| H13A-C13-H13C | 109.5     |

|               |       |
|---------------|-------|
| H13B–C13–H13C | 109.5 |
| N2–C27–H27A   | 96.8  |
| N2–C27–H27B   | 96.0  |
| N2–C27–H27C   | 133.6 |
| H27A–C27–H27B | 109.5 |
| H27A–C27–H27C | 109.4 |
| H27B–C27–H27C | 109.5 |

**Table S4** Crystal data and structure refinements for FBTAM-Cl in the LTP and HTP.

|                              | FBTAM-Cl (302K)                                                               | FBTAM-Cl (433K)                                                                 |
|------------------------------|-------------------------------------------------------------------------------|---------------------------------------------------------------------------------|
| <b>Empirical formula</b>     | C <sub>40</sub> Cl <sub>8</sub> F <sub>8</sub> Mn <sub>2</sub> N <sub>4</sub> | C <sub>20</sub> H <sub>28</sub> Cl <sub>4</sub> F <sub>4</sub> MnN <sub>2</sub> |
| <b>Formula weight</b>        | 1081.92                                                                       | 569.18                                                                          |
| <b>Space group</b>           | <i>P</i> 2 <sub>1</sub> / <i>c</i> (14)                                       | <i>P</i> 2 <sub>1</sub> 2 <sub>1</sub> 2 <sub>1</sub> (19)                      |
| <b>Crystal system</b>        | monoclinic                                                                    | orthorhombic                                                                    |
| <b>a/ Å</b>                  | 27.063(2)                                                                     | 8.8604(13)                                                                      |
| <b>b/ Å</b>                  | 8.6781(3)                                                                     | 12.787(3)                                                                       |
| <b>c/ Å</b>                  | 25.104(2)                                                                     | 24.679(5)                                                                       |
| <b>α/°</b>                   | 90                                                                            | 90                                                                              |
| <b>β/°</b>                   | 116.085(10)                                                                   | 90                                                                              |
| <b>γ/°</b>                   | 90                                                                            | 90                                                                              |
| <b>Volume/ Å<sup>3</sup></b> | 5295.4(8)                                                                     | 2796.1(9)                                                                       |
| <b>Z</b>                     | 4                                                                             | 4                                                                               |
| <b>F(000)</b>                | 2104                                                                          | 1164                                                                            |
| <b>GOF</b>                   | 1.040                                                                         | 1.038                                                                           |
| <b>R<sub>int</sub></b>       | 0.1034                                                                        | 0.0736                                                                          |
| <b>R<sub>1</sub></b>         | 0.1132                                                                        | 0.1054                                                                          |
| <b>wR<sub>2</sub></b>        | 0.3012                                                                        | 0.2839                                                                          |

**Table S5** The bond lengths (Å) and angles (°) of FBTAM-Cl in the LTP.

| Atom–Atom | Length [Å] | Atom–Atom–Atom | Angle [°]  |
|-----------|------------|----------------|------------|
| Mn01–Cl10 | 2.439(2)   | Cl05–Mn01–Cl10 | 112.07(8)  |
| Mn01–Cl05 | 2.426(2)   | Cl06–Mn01–Cl10 | 113.29(9)  |
| Mn01–Cl06 | 2.390(2)   | Cl06–Mn01–Cl05 | 107.40(8)  |
| Mn01–Cl08 | 2.382(2)   | Cl08–Mn01–Cl10 | 108.67(8)  |
| Mn02–Cl04 | 2.447(2)   | Cl08–Mn01–Cl05 | 107.08(9)  |
| Mn02–Cl07 | 2.388(2)   | Cl08–Mn01–Cl06 | 108.08(9)  |
| Mn02–Cl09 | 2.396(2)   | Cl07–Mn02–Cl04 | 110.62(8)  |
| Mn02–Cl0A | 2.387(2)   | Cl07–Mn02–Cl09 | 108.43(8)  |
| N00B–C00S | 1.520(11)  | Cl09–Mn02–Cl04 | 110.42(9)  |
| N00B–C012 | 1.476(11)  | Cl0A–Mn02–Cl04 | 108.59(8)  |
| N00B–C01F | 1.507(13)  | Cl0A–Mn02–Cl07 | 112.91(10) |
| N00B–C01M | 1.483(14)  | Cl0A–Mn02–Cl09 | 105.77(11) |
| N00C–C00Q | 1.536(11)  | C012–N00B–C00S | 111.4(7)   |
| N00C–C010 | 1.468(12)  | C012–N00B–C01F | 108.3(9)   |
| N00C–C015 | 1.521(12)  | C012–N00B–C01M | 109.9(9)   |
| N00C–C017 | 1.507(13)  | C01F–N00B–C00S | 106.0(7)   |
| F00D–C00V | 1.362(12)  | C01M–N00B–C00S | 111.6(8)   |
| N00E–C00R | 1.529(11)  | C01M–N00B–C01F | 109.6(10)  |
| N00E–C01I | 1.474(13)  | C010–N00C–C00Q | 112.5(7)   |
| N00E–C01J | 1.450(14)  | C010–N00C–C015 | 108.9(8)   |
| N00E–C01L | 1.502(13)  | C010–N00C–C017 | 110.0(8)   |
| N00F–C00M | 1.525(11)  | C015–N00C–C00Q | 109.4(8)   |
| N00F–C014 | 1.545(14)  | C017–N00C–C00Q | 105.5(7)   |

|           |           |                |           |
|-----------|-----------|----------------|-----------|
| N00F-C01D | 1.493(13) | C017-N00C-C015 | 110.5(8)  |
| N00F-C01E | 1.503(14) | C01I-N00E-C00R | 108.3(7)  |
| F00G-C00Y | 1.325(12) | C01I-N00E-C01L | 106.2(10) |
| F00H-C019 | 1.339(17) | C01J-N00E-C00R | 110.5(8)  |
| F00I-C011 | 1.357(13) | C01J-N00E-C01I | 108.8(10) |
| C00J-C00P | 1.411(13) | C01J-N00E-C01L | 112.6(11) |
| C00J-C00S | 1.496(13) | C01L-N00E-C00R | 110.2(8)  |
| C00J-C00Y | 1.362(14) | C00M-N00F-C014 | 105.0(8)  |
| C00K-C00R | 1.485(12) | C01D-N00F-C00M | 111.5(8)  |
| C00K-C00X | 1.380(15) | C01D-N00F-C014 | 110.0(9)  |
| C00K-C018 | 1.279(14) | C01D-N00F-C01E | 109.7(9)  |
| F00L-C018 | 1.361(15) | C01E-N00F-C00M | 111.2(8)  |
| C00M-C00O | 1.496(12) | C01E-N00F-C014 | 109.3(9)  |
| F00N-C01G | 1.324(18) | C00P-C00J-C00S | 119.1(9)  |
| C00O-C011 | 1.322(14) | C00Y-C00J-C00P | 118.1(9)  |
| C00O-C01B | 1.375(14) | C00Y-C00J-C00S | 122.6(9)  |
| C00P-C00V | 1.376(14) | C00X-C00K-C00R | 119.5(9)  |
| C00Q-C00U | 1.501(13) | C018-C00K-C00R | 122.2(10) |
| F00T-C00Z | 1.384(15) | C018-C00K-C00X | 117.9(10) |
| C00U-C00W | 1.451(17) | C00O-C00M-N00F | 114.3(7)  |
| C00U-C019 | 1.352(17) | C011-C00O-C00M | 122.9(9)  |
| C00V-C013 | 1.383(18) | C011-C00O-C01B | 117.6(10) |
| C00W-C01G | 1.338(18) | C01B-C00O-C00M | 119.4(9)  |
| C00X-C00Z | 1.366(15) | C00V-C00P-C00J | 117.2(10) |
| C00Y-C01A | 1.404(17) | C00U-C00Q-N00C | 114.4(7)  |
| C00Z-C01K | 1.315(18) | C00K-C00R-N00E | 115.9(7)  |
| C011-C016 | 1.426(16) | C00J-C00S-N00B | 114.9(7)  |
| C013-C01A | 1.387(19) | C00W-C00U-C00Q | 115.7(11) |
| C016-C01C | 1.37(2)   | C019-C00U-C00Q | 123.3(11) |
| C018-C01Q | 1.454(18) | C019-C00U-C00W | 120.6(11) |
| C019-C01P | 1.359(19) | F00D-C00V-C00P | 116.6(11) |
| C01B-C01O | 1.347(18) | F00D-C00V-C013 | 118.2(11) |
| C01C-C01O | 1.38(2)   | C00P-C00V-C013 | 124.9(11) |
| C01G-C01N | 1.50(3)   | C01G-C00W-C00U | 115.8(15) |
| F01H-C01O | 1.329(18) | C00Z-C00X-C00K | 117.7(11) |
| C01K-C01Q | 1.41(2)   | F00G-C00Y-C00J | 118.8(10) |
| C01N-C01P | 1.37(3)   | F00G-C00Y-C01A | 117.0(11) |
|           |           | C00J-C00Y-C01A | 124.2(11) |
|           |           | C00X-C00Z-F00T | 116.5(12) |
|           |           | C01K-C00Z-F00T | 116.6(12) |
|           |           | C01K-C00Z-C00X | 126.8(13) |
|           |           | F00I-C011-C016 | 116.3(11) |
|           |           | C00O-C011-F00I | 119.2(10) |
|           |           | C00O-C011-C016 | 124.4(12) |
|           |           | C01A-C013-C00V | 117.5(11) |
|           |           | C01C-C016-C011 | 116.4(13) |
|           |           | C00K-C018-F00L | 119.3(11) |
|           |           | C00K-C018-C01Q | 125.8(13) |
|           |           | F00L-C018-C01Q | 114.8(11) |
|           |           | F00H-C019-C00U | 119.2(11) |
|           |           | F00H-C019-C01P | 115.8(15) |
|           |           | C01P-C019-C00U | 125.0(16) |
|           |           | C013-C01A-C00Y | 117.8(12) |
|           |           | C01O-C01B-C00O | 120.0(13) |
|           |           | C016-C01C-C01O | 118.6(13) |
|           |           | F00N-C01G-C00W | 120.5(19) |
|           |           | F00N-C01G-C01N | 117.1(14) |

|                |           |
|----------------|-----------|
| C00W–C01G–C01N | 122.1(16) |
| C00Z–C01K–C01Q | 117.0(12) |
| C01P–C01N–C01G | 118.7(13) |
| C01B–C01O–C01C | 122.8(15) |
| F01H–C01O–C01B | 122.1(17) |
| F01H–C01O–C01C | 115.0(14) |
| C019–C01P–C01N | 117.4(17) |
| C01K–C01Q–C018 | 114.6(12) |

**Table S6** The bond lengths (Å) and angles (°) of FBTAM-Cl in the HTP.

| Atom–Atom | Length [Å] | Atom–Atom–Atom | Angle [°]  |
|-----------|------------|----------------|------------|
| Mn1–Cl1   | 2.431(4)   | Cl1–Mn1–Cl4    | 110.02(18) |
| Mn1–Cl4   | 2.436(5)   | Cl2–Mn1–Cl1    | 113.54(17) |
| Mn1–Cl2   | 2.405(4)   | Cl2–Mn1–Cl4    | 107.73(19) |
| Mn1–Cl3   | 2.417(5)   | Cl2–Mn1–Cl3    | 107.3(2)   |
| N1–C4     | 1.523(18)  | Cl3–Mn1–Cl1    | 109.4(2)   |
| N1–C22    | 1.49(2)    | Cl3–Mn1–Cl4    | 108.7(2)   |
| N1–C24    | 1.50(2)    | C22–N1–C4      | 97(3)      |
| N1–C26    | 1.49(2)    | C22–N1–C13     | 113(3)     |
| N1–C13    | 1.51(2)    | C24–N1–C4      | 116.4(19)  |
| N1–C7     | 1.49(2)    | C26–N1–C4      | 108.0(19)  |
| N1–C15    | 1.49(2)    | C26–N1–C24     | 108(2)     |
| N2–C14    | 1.539(19)  | C26–N1–C7      | 102(3)     |
| N2–C16    | 1.558(17)  | C13–N1–C4      | 105(3)     |
| N2–C18    | 1.50(2)    | C7–N1–C4       | 114(2)     |
| N2–C11    | 1.533(18)  | C7–N1–C24      | 107(3)     |
| N2–C23    | 1.55(2)    | C15–N1–C4      | 109(3)     |
| N2–C3     | 1.58(2)    | C15–N1–C22     | 118(4)     |
| N2–C25    | 1.59(2)    | C15–N1–C13     | 112(3)     |
| C1–C4     | 1.51(3)    | C14–N2–C23     | 91.5(19)   |
| C1–C8     | 1.36(3)    | C14–N2–C3      | 134(4)     |
| C1–C20    | 1.49(3)    | C16–N2–C25     | 93.7(16)   |
| F1–C20    | 1.45(3)    | C18–N2–C14     | 106(3)     |
| C4–H4A    | 0.9700     | C18–N2–C16     | 140(3)     |
| C4–H4B    | 0.9700     | C18–N2–C11     | 100(2)     |
| C6–H6     | 0.9300     | C18–N2–C23     | 136(4)     |
| C6–C10    | 1.32(3)    | C18–N2–C3      | 102(3)     |
| C6–C12    | 1.28(3)    | C18–N2–C25     | 106(3)     |
| F4–C12    | 1.47(3)    | C11–N2–C16     | 97.8(18)   |
| C8–H8     | 0.9300     | C11–N2–C25     | 122(4)     |
| C8–C12    | 1.34(3)    | C23–N2–C3      | 93(3)      |
| C10–H10   | 0.9300     | C8–C1–C4       | 124(2)     |
| C10–C20   | 1.29(3)    | C8–C1–C20      | 113(2)     |
| C12–F6    | 1.50(4)    | C20–C1–C4      | 123(2)     |
| C14–H14A  | 0.9600     | N1–C4–H4A      | 107.9      |
| C14–H14B  | 0.9601     | N1–C4–H4B      | 107.9      |
| C14–H14C  | 0.9600     | C1–C4–N1       | 117.7(18)  |
| C16–H16A  | 0.9603     | C1–C4–H4A      | 107.9      |
| C16–H16B  | 0.9601     | C1–C4–H4B      | 107.9      |
| C16–H16C  | 0.9600     | H4A–C4–H4B     | 107.2      |
| C18–H18A  | 0.9700     | C10–C6–H6      | 119.3      |
| C18–H18B  | 0.9700     | C12–C6–H6      | 119.3      |
| C18–C5    | 1.60(2)    | C12–C6–C10     | 121(2)     |
| C20–F8    | 1.44(4)    | C1–C8–H8       | 120.8      |
| C22–H22A  | 0.9600     | C12–C8–C1      | 118(2)     |
| C22–H22B  | 0.9600     | C12–C8–H8      | 120.8      |



|          |           |               |        |
|----------|-----------|---------------|--------|
| C22-H22C | 0.9600    | C6-C10-H10    | 121.2  |
| C24-H24A | 0.9600    | C20-C10-C6    | 118(3) |
| C24-H24B | 0.9598    | C20-C10-H10   | 121.2  |
| C24-H24C | 0.9603    | C6-C12-F4     | 122(3) |
| C26-H26A | 0.9596    | C6-C12-C8     | 125(3) |
| C26-H26B | 0.9595    | C6-C12-F6     | 110(3) |
| C26-H26C | 0.9601    | C8-C12-F4     | 111(3) |
| C13-H13A | 0.9603    | C8-C12-F6     | 119(3) |
| C13-H13B | 0.9599    | N2-C14-H14A   | 98.7   |
| C13-H13C | 0.9603    | N2-C14-H14B   | 107.2  |
| C7-H7A   | 0.9599    | N2-C14-H14C   | 121.8  |
| C7-H7B   | 0.9601    | H14A-C14-H14B | 109.5  |
| C7-H7C   | 0.9596    | H14A-C14-H14C | 109.5  |
| C15-H15A | 0.9601    | H14B-C14-H14C | 109.4  |
| C15-H15B | 0.9596    | N2-C16-H16A   | 112.0  |
| C15-H15C | 0.9595    | N2-C16-H16B   | 121.4  |
| C2-H2    | 0.9300    | N2-C16-H16C   | 93.5   |
| C2-C17   | 1.3900    | H16A-C16-H16B | 109.5  |
| C2-C21   | 1.3900    | H16A-C16-H16C | 109.5  |
| C17-H17  | 0.9300    | H16B-C16-H16C | 109.5  |
| C17-C9   | 1.3900    | N2-C18-H18A   | 109.2  |
| C9-C19   | 1.3900    | N2-C18-H18B   | 109.2  |
| C9-F5    | 1.428(18) | N2-C18-C5     | 112(2) |
| C9-F3    | 1.43(2)   | H18A-C18-H18B | 107.9  |
| C19-H19  | 0.9300    | C5-C18-H18A   | 109.2  |
| C19-C5   | 1.3900    | C5-C18-H18B   | 109.2  |
| C5-C21   | 1.3900    | F1-C20-C1     | 105(2) |
| C21-F2   | 1.437(19) | C10-C20-C1    | 124(3) |
| C21-F7   | 1.44(3)   | C10-C20-F1    | 131(3) |
| C11-H11A | 0.9599    | C10-C20-F8    | 103(3) |
| C11-H11B | 0.9596    | F8-C20-C1     | 132(3) |
| C11-H11C | 0.9607    | N1-C22-H22A   | 109.5  |
| C23-H23A | 0.9601    | N1-C22-H22B   | 109.5  |
| C23-H23B | 0.9599    | N1-C22-H22C   | 109.5  |
| C23-H23C | 0.9604    | H22A-C22-H22B | 109.5  |
| C3-H3A   | 0.9600    | H22A-C22-H22C | 109.5  |
| C3-H3B   | 0.9599    | H22B-C22-H22C | 109.5  |
| C3-H3C   | 0.9599    | N1-C24-H24A   | 107.6  |
| C25-H25A | 0.9601    | N1-C24-H24B   | 111.9  |
| C25-H25B | 0.9600    | N1-C24-H24C   | 108.8  |
| C25-H25C | 0.9599    | H24A-C24-H24B | 109.5  |
|          |           | H24A-C24-H24C | 109.5  |
|          |           | H24B-C24-H24C | 109.5  |
|          |           | N1-C26-H26A   | 111.0  |
|          |           | N1-C26-H26B   | 110.4  |
|          |           | N1-C26-H26C   | 107.0  |
|          |           | H26A-C26-H26B | 109.5  |
|          |           | H26A-C26-H26C | 109.5  |
|          |           | H26B-C26-H26C | 109.5  |
|          |           | N1-C13-H13A   | 105.2  |
|          |           | N1-C13-H13B   | 110.1  |
|          |           | N1-C13-H13C   | 113.0  |
|          |           | H13A-C13-H13B | 109.5  |
|          |           | H13A-C13-H13C | 109.4  |
|          |           | H13B-C13-H13C | 109.5  |
|          |           | N1-C7-H7A     | 112.4  |
|          |           | N1-C7-H7B     | 107.4  |

|               |           |
|---------------|-----------|
| N1-C7-H7C     | 108.5     |
| H7A-C7-H7B    | 109.5     |
| H7A-C7-H7C    | 109.5     |
| H7B-C7-H7C    | 109.5     |
| N1-C15-H15A   | 111.4     |
| N1-C15-H15B   | 114.3     |
| N1-C15-H15C   | 102.3     |
| H15A-C15-H15B | 109.5     |
| H15A-C15-H15C | 109.5     |
| H15B-C15-H15C | 109.6     |
| C17-C2-H2     | 120.0     |
| C17-C2-C21    | 120.0     |
| C21-C2-H2     | 120.0     |
| C2-C17-H17    | 120.0     |
| C9-C17-C2     | 120.0     |
| C9-C17-H17    | 120.0     |
| C17-C9-C19    | 120.0     |
| C17-C9-F5     | 110(2)    |
| C17-C9-F3     | 119(3)    |
| C19-C9-F5     | 127(2)    |
| C19-C9-F3     | 103(3)    |
| C9-C19-H19    | 120.0     |
| C5-C19-C9     | 120.0     |
| C5-C19-H19    | 120.0     |
| C19-C5-C18    | 107.9(17) |
| C19-C5-C21    | 120.0     |
| C21-C5-C18    | 132.1(17) |
| C2-C21-F2     | 98(2)     |
| C2-C21-F7     | 132(3)    |
| C5-C21-C2     | 120.0     |
| C5-C21-F2     | 122(3)    |
| C5-C21-F7     | 101(3)    |
| N2-C11-H11A   | 91.8      |
| N2-C11-H11B   | 135.9     |
| N2-C11-H11C   | 98.1      |
| H11A-C11-H11B | 109.5     |
| H11A-C11-H11C | 109.4     |
| H11B-C11-H11C | 109.5     |
| N2-C23-H23A   | 112.1     |
| N2-C23-H23B   | 120.8     |
| N2-C23-H23C   | 94.1      |
| H23A-C23-H23B | 109.5     |
| H23A-C23-H23C | 109.5     |
| H23B-C23-H23C | 109.4     |
| N2-C3-H3A     | 106.8     |
| N2-C3-H3B     | 117.9     |
| N2-C3-H3C     | 103.4     |
| H3A-C3-H3B    | 109.5     |
| H3A-C3-H3C    | 109.5     |
| H3B-C3-H3C    | 109.5     |
| N2-C25-H25A   | 84.9      |
| N2-C25-H25B   | 122.6     |
| N2-C25-H25C   | 117.3     |
| H25A-C25-H25B | 109.5     |
| H25A-C25-H25C | 109.5     |
| H25B-C25-H25C | 109.5     |

---

**Table S7** The distance between adjacent inorganic frameworks of FBTAM-Cl in the LTP and HTP.

|                                    | FBTAM-Cl (302K) | FBTAM-Cl (433K) |
|------------------------------------|-----------------|-----------------|
| <b>Inorganic skeleton distance</b> | 11.0045(24)     | 8.6781(19)      |
| <b>Inorganic skeleton distance</b> | 11.3813(37)     | 8.8604(40)      |

**Table S8** Crystal data and structure refinements for FBTAM-I in the LTP.

| FBTAM-I (301K)               |                                                                                                 |
|------------------------------|-------------------------------------------------------------------------------------------------|
| <b>Empirical formula</b>     | C <sub>80</sub> H <sub>112</sub> F <sub>16</sub> I <sub>16</sub> Mn <sub>4</sub> N <sub>8</sub> |
| <b>Formula weight</b>        | 3739.93                                                                                         |
| <b>Space group</b>           | $P\bar{1}$ (2)                                                                                  |
| <b>Crystal system</b>        | triclinic                                                                                       |
| <b>a/ Å</b>                  | 10.5000(4)                                                                                      |
| <b>b/ Å</b>                  | 18.0029(7)                                                                                      |
| <b>c/ Å</b>                  | 31.9824(8)                                                                                      |
| <b><math>\alpha</math>/°</b> | 101.214(3)                                                                                      |
| <b><math>\beta</math>/°</b>  | 92.164(2)                                                                                       |
| <b><math>\gamma</math>/°</b> | 93.299(3)                                                                                       |
| <b>Volume/ Å<sup>3</sup></b> | 5913.0(4)                                                                                       |
| <b>Z</b>                     | 2                                                                                               |
| <b>F(000)</b>                | 3480                                                                                            |
| <b>GOF</b>                   | 0.813                                                                                           |
| <b>R<sub>int</sub></b>       | 0.0685                                                                                          |
| <b>R<sub>1</sub></b>         | 0.0491                                                                                          |
| <b>wR<sub>2</sub></b>        | 0.1265                                                                                          |

**Table S9** The bond lengths (Å) and angles (°) of FBTAM-I in the LTP.

| Atom–Atom | Length [Å] | Atom–Atom–Atom | Angle [°] |
|-----------|------------|----------------|-----------|
| I10–Mn3   | 2.7195(13) | I10–Mn3–I9     | 107.59(4) |
| I4–Mn1    | 2.6727(14) | I12–Mn3–I10    | 109.81(5) |
| I14–Mn4   | 2.6589(14) | I12–Mn3–I9     | 109.68(5) |
| I13–Mn4   | 2.7184(14) | I12–Mn3–I11    | 107.63(5) |
| I2–Mn1    | 2.7460(13) | I11–Mn3–I10    | 111.40(5) |
| I9–Mn3    | 2.7284(13) | I11–Mn3–I9     | 110.73(5) |
| I12–Mn3   | 2.6794(14) | I14–Mn4–I13    | 108.74(5) |
| I5–Mn2    | 2.7036(14) | I14–Mn4–I15    | 111.64(5) |
| I15–Mn4   | 2.6776(13) | I14–Mn4–I16    | 109.17(5) |
| I8–Mn2    | 2.7384(14) | I15–Mn4–I13    | 108.92(5) |
| I1–Mn1    | 2.7082(14) | I16–Mn4–I13    | 108.79(5) |
| I6–Mn2    | 2.6975(15) | I16–Mn4–I15    | 109.53(5) |
| I16–Mn4   | 2.6621(14) | I5–Mn2–I8      | 107.95(5) |
| I11–Mn3   | 2.6797(15) | I6–Mn2–I5      | 109.00(5) |
| I7–Mn2    | 2.6786(14) | I6–Mn2–I8      | 107.57(5) |
| I3–Mn1    | 2.6750(15) | I7–Mn2–I5      | 110.69(5) |
| F11–C26   | 1.372(10)  | I7–Mn2–I8      | 110.88(5) |
| F6–C55    | 1.360(10)  | I7–Mn2–I6      | 110.66(5) |
| F16–C3    | 1.359(10)  | I4–Mn1–I2      | 108.35(5) |
| F12–C29   | 1.330(10)  | I4–Mn1–I1      | 109.09(5) |
| F10–C35   | 1.348(10)  | I4–Mn1–I3      | 108.62(5) |
| F3–C64    | 1.370(10)  | I1–Mn1–I2      | 106.78(5) |
| F4–C67    | 1.375(10)  | I3–Mn1–I2      | 110.03(5) |
| N00S–C70  | 1.485(10)  | I3–Mn1–I1      | 113.84(5) |
| N00S–C71  | 1.505(11)  | C70–N00S–C71   | 108.5(7)  |
| N00S–C68  | 1.541(10)  | C70–N00S–C68   | 111.5(6)  |

|          |           |              |          |
|----------|-----------|--------------|----------|
| N00S-C69 | 1.490(11) | C70-N00S-C69 | 109.6(7) |
| N00T-C24 | 1.528(9)  | C71-N00S-C68 | 107.0(7) |
| N00T-C21 | 1.484(11) | C69-N00S-C71 | 108.4(7) |
| N00T-C23 | 1.492(11) | C69-N00S-C68 | 111.7(7) |
| N00T-C22 | 1.494(11) | C21-N00T-C24 | 112.0(7) |
| F2-C52   | 1.342(10) | C21-N00T-C23 | 109.4(7) |
| N00V-C20 | 1.501(11) | C21-N00T-C22 | 108.5(7) |
| N00V-C17 | 1.529(10) | C23-N00T-C24 | 110.1(6) |
| N00V-C19 | 1.506(11) | C23-N00T-C22 | 111.0(8) |
| N00V-C18 | 1.488(11) | C22-N00T-C24 | 105.8(7) |
| F8-C51   | 1.352(11) | C20-N00V-C17 | 110.6(7) |
| F5-C81   | 1.342(11) | C20-N00V-C19 | 108.5(7) |
| F9-C32   | 1.370(11) | C19-N00V-C17 | 106.9(7) |
| F1-C78   | 1.329(11) | C18-N00V-C20 | 109.4(7) |
| F14-C15  | 1.362(11) | C18-N00V-C17 | 111.9(7) |
| F13-C12  | 1.373(11) | C18-N00V-C19 | 109.4(7) |
| F15-C6   | 1.376(11) | C74-N014-C75 | 110.7(7) |
| F7-C48   | 1.369(11) | C74-N014-C73 | 107.2(8) |
| N014-C75 | 1.538(11) | C72-N014-C75 | 110.6(7) |
| N014-C74 | 1.482(11) | C72-N014-C74 | 110.2(8) |
| N014-C72 | 1.469(11) | C72-N014-C73 | 110.8(8) |
| N014-C73 | 1.509(12) | C73-N014-C75 | 107.2(8) |
| N015-C38 | 1.523(11) | C41-N015-C38 | 111.8(7) |
| N015-C41 | 1.502(12) | C40-N015-C38 | 110.8(8) |
| N015-C40 | 1.483(12) | C40-N015-C41 | 109.5(8) |
| N015-C39 | 1.494(12) | C40-N015-C39 | 108.6(8) |
| N016-C58 | 1.524(11) | C39-N015-C38 | 107.2(7) |
| N016-C61 | 1.506(10) | C39-N015-C41 | 108.9(9) |
| N016-C59 | 1.478(12) | C61-N016-C58 | 110.5(7) |
| N016-C60 | 1.512(12) | C61-N016-C60 | 108.2(7) |
| N017-C7  | 1.521(11) | C59-N016-C58 | 110.2(7) |
| N017-C8  | 1.477(12) | C59-N016-C61 | 110.1(8) |
| N017-C10 | 1.467(12) | C59-N016-C60 | 110.7(8) |
| N017-C9  | 1.460(13) | C60-N016-C58 | 107.1(8) |
| C25-C26  | 1.369(11) | C8-N017-C7   | 110.6(7) |
| C25-C30  | 1.382(11) | C10-N017-C7  | 112.3(7) |
| C25-C24  | 1.508(11) | C10-N017-C8  | 108.2(9) |
| N019-C45 | 1.514(11) | C9-N017-C7   | 107.4(8) |
| N019-C43 | 1.492(12) | C9-N017-C8   | 108.1(9) |
| N019-C42 | 1.478(12) | C9-N017-C10  | 110.2(9) |
| N019-C44 | 1.484(12) | C26-C25-C30  | 116.4(8) |
| C65-C66  | 1.389(11) | C26-C25-C24  | 122.5(8) |
| C65-C68  | 1.484(11) | C30-C25-C24  | 121.1(7) |
| C65-C64  | 1.361(12) | C43-N019-C45 | 107.5(7) |
| C66-H66  | 0.9300    | C42-N019-C45 | 110.7(8) |
| C66-C67  | 1.371(13) | C42-N019-C43 | 108.3(8) |
| C14-C13  | 1.397(12) | C42-N019-C44 | 108.8(9) |
| C14-C17  | 1.484(11) | C44-N019-C45 | 112.2(8) |
| C14-C15  | 1.376(12) | C44-N019-C43 | 109.3(9) |
| C36-C38  | 1.493(11) | C66-C65-C68  | 122.5(8) |
| C36-C37  | 1.386(12) | C64-C65-C66  | 115.5(8) |
| C36-C35  | 1.393(11) | C64-C65-C68  | 121.9(8) |
| C26-C27  | 1.345(13) | C65-C66-H66  | 120.5    |
| C30-H30  | 0.9300    | C67-C66-C65  | 119.1(8) |
| C30-C29  | 1.362(12) | C67-C66-H66  | 120.5    |
| C56-C58  | 1.492(12) | C13-C14-C17  | 121.8(8) |
| C56-C55  | 1.385(12) | C15-C14-C13  | 115.6(8) |

|          |           |               |          |
|----------|-----------|---------------|----------|
| C56-C57  | 1.395(12) | C15-C14-C17   | 122.4(8) |
| C24-H24A | 0.9700    | C37-C36-C38   | 120.9(7) |
| C24-H24B | 0.9700    | C37-C36-C35   | 115.4(8) |
| C4-C3    | 1.362(13) | C35-C36-C38   | 123.5(8) |
| C4-C5    | 1.407(12) | C25-C26-F11   | 117.8(8) |
| C4-C7    | 1.482(13) | C27-C26-F11   | 118.4(8) |
| C46-C45  | 1.503(12) | C27-C26-C25   | 123.8(9) |
| C46-C47  | 1.371(12) | C25-C30-H30   | 119.8    |
| C46-C51  | 1.383(13) | C29-C30-C25   | 120.4(8) |
| C13-H13  | 0.9300    | C29-C30-H30   | 119.8    |
| C13-C12  | 1.351(13) | C55-C56-C58   | 123.3(8) |
| C38-H38A | 0.9700    | C55-C56-C57   | 115.9(8) |
| C38-H38B | 0.9700    | C57-C56-C58   | 120.8(8) |
| C3-C2    | 1.374(13) | N00T-C24-H24A | 108.7    |
| C70-H70A | 0.9600    | N00T-C24-H24B | 108.7    |
| C70-H70B | 0.9600    | C25-C24-N00T  | 114.3(7) |
| C70-H70C | 0.9600    | C25-C24-H24A  | 108.7    |
| C37-H37  | 0.9300    | C25-C24-H24B  | 108.7    |
| C37-C32  | 1.368(12) | H24A-C24-H24B | 107.6    |
| C71-H71A | 0.9600    | C3-C4-C5      | 115.5(9) |
| C71-H71B | 0.9600    | C3-C4-C7      | 123.9(8) |
| C71-H71C | 0.9600    | C5-C4-C7      | 120.5(9) |
| C35-C34  | 1.355(13) | C47-C46-C45   | 120.5(9) |
| C77-H77  | 0.9300    | C47-C46-C51   | 116.2(8) |
| C77-C76  | 1.380(12) | C51-C46-C45   | 123.3(9) |
| C77-C78  | 1.345(13) | C14-C13-H13   | 120.7    |
| C32-C33  | 1.344(14) | C12-C13-C14   | 118.6(8) |
| C21-H21A | 0.9600    | C12-C13-H13   | 120.7    |
| C21-H21B | 0.9600    | N015-C38-H38A | 108.8    |
| C21-H21C | 0.9600    | N015-C38-H38B | 108.8    |
| C5-H5    | 0.9300    | C36-C38-N015  | 113.8(6) |
| C5-C6    | 1.380(14) | C36-C38-H38A  | 108.8    |
| C58-H58A | 0.9700    | C36-C38-H38B  | 108.8    |
| C58-H58B | 0.9700    | H38A-C38-H38B | 107.7    |
| C55-C54  | 1.362(13) | F16-C3-C4     | 118.3(8) |
| C27-H27  | 0.9300    | F16-C3-C2     | 116.2(9) |
| C27-C28  | 1.367(14) | C4-C3-C2      | 125.5(9) |
| C68-H68A | 0.9700    | N00S-C70-H70A | 109.5    |
| C68-H68B | 0.9700    | N00S-C70-H70B | 109.5    |
| C57-H57  | 0.9300    | N00S-C70-H70C | 109.5    |
| C57-C52  | 1.385(13) | H70A-C70-H70B | 109.5    |
| C75-H75A | 0.9700    | H70A-C70-H70C | 109.5    |
| C75-H75B | 0.9700    | H70B-C70-H70C | 109.5    |
| C75-C76  | 1.488(13) | C36-C37-H37   | 119.8    |
| C20-H20A | 0.9600    | C32-C37-C36   | 120.4(9) |
| C20-H20B | 0.9600    | C32-C37-H37   | 119.8    |
| C20-H20C | 0.9600    | N00S-C71-H71A | 109.5    |
| C76-C81  | 1.385(13) | N00S-C71-H71B | 109.5    |
| C17-H17A | 0.9700    | N00S-C71-H71C | 109.5    |
| C17-H17B | 0.9700    | H71A-C71-H71B | 109.5    |
| C67-C62  | 1.341(14) | H71A-C71-H71C | 109.5    |
| C54-H54  | 0.9300    | H71B-C71-H71C | 109.5    |
| C54-C53  | 1.365(14) | F10-C35-C36   | 116.9(8) |
| C29-C28  | 1.384(13) | F10-C35-C34   | 119.9(8) |
| C34-H34  | 0.9300    | C34-C35-C36   | 123.0(9) |
| C34-C33  | 1.357(15) | C76-C77-H77   | 119.2    |
| C45-H45A | 0.9700    | C78-C77-H77   | 119.2    |

|          |           |               |           |
|----------|-----------|---------------|-----------|
| C45-H45B | 0.9700    | C78-C77-C76   | 121.6(9)  |
| C28-H28  | 0.9300    | C37-C32-F9    | 118.0(9)  |
| C12-C11  | 1.338(14) | C33-C32-F9    | 119.3(9)  |
| C64-C63  | 1.360(13) | C33-C32-C37   | 122.6(10) |
| C49-H49  | 0.9300    | N00T-C21-H21A | 109.5     |
| C49-C50  | 1.374(15) | N00T-C21-H21B | 109.5     |
| C49-C48  | 1.336(14) | N00T-C21-H21C | 109.5     |
| C47-H47  | 0.9300    | H21A-C21-H21B | 109.5     |
| C47-C48  | 1.372(13) | H21A-C21-H21C | 109.5     |
| C61-H61A | 0.9600    | H21B-C21-H21C | 109.5     |
| C61-H61B | 0.9600    | C4-C5-H5      | 120.8     |
| C61-H61C | 0.9600    | C6-C5-C4      | 118.4(10) |
| C51-C50  | 1.359(14) | C6-C5-H5      | 120.8     |
| C7-H7A   | 0.9700    | N016-C58-H58A | 108.4     |
| C7-H7B   | 0.9700    | N016-C58-H58B | 108.4     |
| C52-C53  | 1.387(14) | C56-C58-N016  | 115.3(7)  |
| C15-C16  | 1.373(14) | C56-C58-H58A  | 108.4     |
| C19-H19A | 0.9600    | C56-C58-H58B  | 108.4     |
| C19-H19B | 0.9600    | H58A-C58-H58B | 107.5     |
| C19-H19C | 0.9600    | F6-C55-C56    | 117.5(8)  |
| C2-H2    | 0.9300    | F6-C55-C54    | 117.9(9)  |
| C2-C1    | 1.365(15) | C54-C55-C56   | 124.6(8)  |
| C33-H33  | 0.9300    | C26-C27-H27   | 120.0     |
| C50-H50  | 0.9300    | C26-C27-C28   | 119.9(9)  |
| C74-H74A | 0.9600    | C28-C27-H27   | 120.0     |
| C74-H74B | 0.9600    | N00S-C68-H68A | 108.7     |
| C74-H74C | 0.9600    | N00S-C68-H68B | 108.7     |
| C23-H23A | 0.9600    | C65-C68-N00S  | 114.3(7)  |
| C23-H23B | 0.9600    | C65-C68-H68A  | 108.7     |
| C23-H23C | 0.9600    | C65-C68-H68B  | 108.7     |
| C62-H62  | 0.9300    | H68A-C68-H68B | 107.6     |
| C62-C63  | 1.347(14) | C56-C57-H57   | 120.1     |
| C79-H79  | 0.9300    | C52-C57-C56   | 119.8(8)  |
| C79-C78  | 1.360(14) | C52-C57-H57   | 120.1     |
| C79-C80  | 1.363(15) | N014-C75-H75A | 108.5     |
| C53-H53  | 0.9300    | N014-C75-H75B | 108.5     |
| C6-C1    | 1.351(16) | H75A-C75-H75B | 107.5     |
| C16-H16  | 0.9300    | C76-C75-N014  | 115.1(7)  |
| C16-C11  | 1.360(15) | C76-C75-H75A  | 108.5     |
| C1-H1    | 0.9300    | C76-C75-H75B  | 108.5     |
| C41-H41A | 0.9600    | N00V-C20-H20A | 109.5     |
| C41-H41B | 0.9600    | N00V-C20-H20B | 109.5     |
| C41-H41C | 0.9600    | N00V-C20-H20C | 109.5     |
| C59-H59A | 0.9600    | H20A-C20-H20B | 109.5     |
| C59-H59B | 0.9600    | H20A-C20-H20C | 109.5     |
| C59-H59C | 0.9600    | H20B-C20-H20C | 109.5     |
| C81-C80  | 1.370(15) | C77-C76-C75   | 122.2(9)  |
| C69-H69A | 0.9600    | C77-C76-C81   | 116.3(10) |
| C69-H69B | 0.9600    | C81-C76-C75   | 121.5(9)  |
| C69-H69C | 0.9600    | N00V-C17-H17A | 108.8     |
| C18-H18A | 0.9600    | N00V-C17-H17B | 108.8     |
| C18-H18B | 0.9600    | C14-C17-N00V  | 114.0(7)  |
| C18-H18C | 0.9600    | C14-C17-H17A  | 108.8     |
| C22-H22A | 0.9600    | C14-C17-H17B  | 108.8     |
| C22-H22B | 0.9600    | H17A-C17-H17B | 107.7     |
| C22-H22C | 0.9600    | C66-C67-F4    | 116.2(9)  |
| C63-H63  | 0.9300    | C62-C67-F4    | 120.9(10) |

|          |        |               |           |
|----------|--------|---------------|-----------|
| C8-H8A   | 0.9600 | C62-C67-C66   | 122.8(9)  |
| C8-H8B   | 0.9600 | C55-C54-H54   | 120.4     |
| C8-H8C   | 0.9600 | C55-C54-C53   | 119.1(9)  |
| C11-H11  | 0.9300 | C53-C54-H54   | 120.4     |
| C80-H80  | 0.9300 | F12-C29-C30   | 119.2(9)  |
| C10-H10A | 0.9600 | F12-C29-C28   | 118.9(9)  |
| C10-H10B | 0.9600 | C30-C29-C28   | 121.8(9)  |
| C10-H10C | 0.9600 | C35-C34-H34   | 120.0     |
| C40-H40A | 0.9600 | C35-C34-C33   | 120.0(9)  |
| C40-H40B | 0.9600 | C33-C34-H34   | 120.0     |
| C40-H40C | 0.9600 | N019-C45-H45A | 108.3     |
| C43-H43A | 0.9600 | N019-C45-H45B | 108.3     |
| C43-H43B | 0.9600 | C46-C45-N019  | 115.8(7)  |
| C43-H43C | 0.9600 | C46-C45-H45A  | 108.3     |
| C60-H60A | 0.9600 | C46-C45-H45B  | 108.3     |
| C60-H60B | 0.9600 | H45A-C45-H45B | 107.4     |
| C60-H60C | 0.9600 | C27-C28-C29   | 117.6(9)  |
| C72-H72A | 0.9600 | C27-C28-H28   | 121.2     |
| C72-H72B | 0.9600 | C29-C28-H28   | 121.2     |
| C72-H72C | 0.9600 | C13-C12-F13   | 116.5(9)  |
| C39-H39A | 0.9600 | C11-C12-F13   | 118.2(10) |
| C39-H39B | 0.9600 | C11-C12-C13   | 125.2(9)  |
| C39-H39C | 0.9600 | C65-C64-F3    | 118.3(8)  |
| C42-H42A | 0.9600 | C63-C64-F3    | 116.3(8)  |
| C42-H42B | 0.9600 | C63-C64-C65   | 125.3(8)  |
| C42-H42C | 0.9600 | C50-C49-H49   | 121.0     |
| C73-H73A | 0.9600 | C48-C49-H49   | 121.0     |
| C73-H73B | 0.9600 | C48-C49-C50   | 117.9(10) |
| C73-H73C | 0.9600 | C46-C47-H47   | 120.3     |
| C44-H44A | 0.9600 | C46-C47-C48   | 119.5(10) |
| C44-H44B | 0.9600 | C48-C47-H47   | 120.3     |
| C44-H44C | 0.9600 | N016-C61-H61A | 109.5     |
| C9-H9A   | 0.9600 | N016-C61-H61B | 109.5     |
| C9-H9B   | 0.9600 | N016-C61-H61C | 109.5     |
| C9-H9C   | 0.9600 | H61A-C61-H61B | 109.5     |
|          |        | H61A-C61-H61C | 109.5     |
|          |        | H61B-C61-H61C | 109.5     |
|          |        | F8-C51-C46    | 117.9(9)  |
|          |        | F8-C51-C50    | 118.3(10) |
|          |        | C50-C51-C46   | 123.6(10) |
|          |        | N017-C7-H7A   | 108.8     |
|          |        | N017-C7-H7B   | 108.8     |
|          |        | C4-C7-N017    | 113.8(8)  |
|          |        | C4-C7-H7A     | 108.8     |
|          |        | C4-C7-H7B     | 108.8     |
|          |        | H7A-C7-H7B    | 107.7     |
|          |        | F2-C52-C57    | 117.8(9)  |
|          |        | F2-C52-C53    | 120.2(9)  |
|          |        | C57-C52-C53   | 122.0(9)  |
|          |        | F14-C15-C14   | 117.9(8)  |
|          |        | F14-C15-C16   | 118.1(9)  |
|          |        | C16-C15-C14   | 124.0(9)  |
|          |        | N00V-C19-H19A | 109.5     |
|          |        | N00V-C19-H19B | 109.5     |
|          |        | N00V-C19-H19C | 109.5     |
|          |        | H19A-C19-H19B | 109.5     |
|          |        | H19A-C19-H19C | 109.5     |

|               |           |
|---------------|-----------|
| H19B-C19-H19C | 109.5     |
| C3-C2-H2      | 120.9     |
| C1-C2-C3      | 118.1(10) |
| C1-C2-H2      | 120.9     |
| C32-C33-C34   | 118.5(10) |
| C32-C33-H33   | 120.8     |
| C34-C33-H33   | 120.8     |
| C49-C50-H50   | 120.5     |
| C51-C50-C49   | 119.0(11) |
| C51-C50-H50   | 120.5     |
| N014-C74-H74A | 109.5     |
| N014-C74-H74B | 109.5     |
| N014-C74-H74C | 109.5     |
| H74A-C74-H74B | 109.5     |
| H74A-C74-H74C | 109.5     |
| H74B-C74-H74C | 109.5     |
| N00T-C23-H23A | 109.5     |
| N00T-C23-H23B | 109.5     |
| N00T-C23-H23C | 109.5     |
| H23A-C23-H23B | 109.5     |
| H23A-C23-H23C | 109.5     |
| H23B-C23-H23C | 109.5     |
| C67-C62-H62   | 120.2     |
| C67-C62-C63   | 119.5(10) |
| C63-C62-H62   | 120.2     |
| C78-C79-H79   | 119.5     |
| C78-C79-C80   | 121.0(11) |
| C80-C79-H79   | 119.5     |
| F7-C48-C47    | 116.5(10) |
| C49-C48-F7    | 119.7(9)  |
| C49-C48-C47   | 123.8(10) |
| C54-C53-C52   | 118.5(10) |
| C54-C53-H53   | 120.8     |
| C52-C53-H53   | 120.8     |
| F15-C6-C5     | 116.7(11) |
| C1-C6-F15     | 119.4(10) |
| C1-C6-C5      | 123.9(10) |
| C15-C16-H16   | 120.6     |
| C11-C16-C15   | 118.7(9)  |
| C11-C16-H16   | 120.6     |
| C2-C1-H1      | 120.9     |
| C6-C1-C2      | 118.2(10) |
| C6-C1-H1      | 120.9     |
| N015-C41-H41A | 109.5     |
| N015-C41-H41B | 109.5     |
| N015-C41-H41C | 109.5     |
| H41A-C41-H41B | 109.5     |
| H41A-C41-H41C | 109.5     |
| H41B-C41-H41C | 109.5     |
| N016-C59-H59A | 109.5     |
| N016-C59-H59B | 109.5     |
| N016-C59-H59C | 109.5     |
| H59A-C59-H59B | 109.5     |
| H59A-C59-H59C | 109.5     |
| H59B-C59-H59C | 109.5     |
| F5-C81-C76    | 119.1(10) |
| F5-C81-C80    | 118.1(10) |



|               |           |
|---------------|-----------|
| C80-C81-C76   | 122.8(10) |
| N00S-C69-H69A | 109.5     |
| N00S-C69-H69B | 109.5     |
| N00S-C69-H69C | 109.5     |
| H69A-C69-H69B | 109.5     |
| H69A-C69-H69C | 109.5     |
| H69B-C69-H69C | 109.5     |
| N00V-C18-H18A | 109.5     |
| N00V-C18-H18B | 109.5     |
| N00V-C18-H18C | 109.5     |
| H18A-C18-H18B | 109.5     |
| H18A-C18-H18C | 109.5     |
| H18B-C18-H18C | 109.5     |
| N00T-C22-H22A | 109.5     |
| N00T-C22-H22B | 109.5     |
| N00T-C22-H22C | 109.5     |
| H22A-C22-H22B | 109.5     |
| H22A-C22-H22C | 109.5     |
| H22B-C22-H22C | 109.5     |
| C64-C63-H63   | 121.1     |
| C62-C63-C64   | 117.7(10) |
| C62-C63-H63   | 121.1     |
| F1-C78-C77    | 119.8(9)  |
| F1-C78-C79    | 119.8(10) |
| C77-C78-C79   | 120.4(10) |
| N017-C8-H8A   | 109.5     |
| N017-C8-H8B   | 109.5     |
| N017-C8-H8C   | 109.5     |
| H8A-C8-H8B    | 109.5     |
| H8A-C8-H8C    | 109.5     |
| H8B-C8-H8C    | 109.5     |
| C12-C11-C16   | 117.7(9)  |
| C12-C11-H11   | 121.2     |
| C16-C11-H11   | 121.2     |
| C79-C80-C81   | 117.8(11) |
| C79-C80-H80   | 121.1     |
| C81-C80-H80   | 121.1     |
| N017-C10-H10A | 109.5     |
| N017-C10-H10B | 109.5     |
| N017-C10-H10C | 109.5     |
| H10A-C10-H10B | 109.5     |
| H10A-C10-H10C | 109.5     |
| H10B-C10-H10C | 109.5     |
| N015-C40-H40A | 109.5     |
| N015-C40-H40B | 109.5     |
| N015-C40-H40C | 109.5     |
| H40A-C40-H40B | 109.5     |
| H40A-C40-H40C | 109.5     |
| H40B-C40-H40C | 109.5     |
| N019-C43-H43A | 109.5     |
| N019-C43-H43B | 109.5     |
| N019-C43-H43C | 109.5     |
| H43A-C43-H43B | 109.5     |
| H43A-C43-H43C | 109.5     |
| H43B-C43-H43C | 109.5     |
| N016-C60-H60A | 109.5     |
| N016-C60-H60B | 109.5     |

|               |       |
|---------------|-------|
| N016-C60-H60C | 109.5 |
| H60A-C60-H60B | 109.5 |
| H60A-C60-H60C | 109.5 |
| H60B-C60-H60C | 109.5 |
| N014-C72-H72A | 109.5 |
| N014-C72-H72B | 109.5 |
| N014-C72-H72C | 109.5 |
| H72A-C72-H72B | 109.5 |
| H72A-C72-H72C | 109.5 |
| H72B-C72-H72C | 109.5 |
| N015-C39-H39A | 109.5 |
| N015-C39-H39B | 109.5 |
| N015-C39-H39C | 109.5 |
| H39A-C39-H39B | 109.5 |
| H39A-C39-H39C | 109.5 |
| H39B-C39-H39C | 109.5 |
| N019-C42-H42A | 109.5 |
| N019-C42-H42B | 109.5 |
| N019-C42-H42C | 109.5 |
| H42A-C42-H42B | 109.5 |
| H42A-C42-H42C | 109.5 |
| H42B-C42-H42C | 109.5 |
| N014-C73-H73A | 109.5 |
| N014-C73-H73B | 109.5 |
| N014-C73-H73C | 109.5 |
| H73A-C73-H73B | 109.5 |
| H73A-C73-H73C | 109.5 |
| H73B-C73-H73C | 109.5 |
| N019-C44-H44A | 109.5 |
| N019-C44-H44B | 109.5 |
| N019-C44-H44C | 109.5 |
| H44A-C44-H44B | 109.5 |
| H44A-C44-H44C | 109.5 |
| H44B-C44-H44C | 109.5 |
| N017-C9-H9A   | 109.5 |
| N017-C9-H9B   | 109.5 |
| N017-C9-H9C   | 109.5 |
| H9A-C9-H9B    | 109.5 |
| H9A-C9-H9C    | 109.5 |
| H9B-C9-H9C    | 109.5 |

---
